# Supplementary material
Source: PubMed Central journal article supplement (PMC3770104)
Supplement: supp_P041673_jlr.P041673-1.pdf [file supp_P041673_jlr.P041673-1.pdf]

## Supplemental Methods

MZ twins are derived from a single fertilized egg cell (zygote) and therefore share (nearly) 100% of their segregating genes. DZ twins (who are derived from two zygotes) and non-twin siblings share on average 50% of their segregating genes. Parents share 50% of their genetic material with their children. Common environmental influences may be shared by siblings (“sibling-shared environmental effects”) or by individuals who share a household (“shared household effects”). In our study, the parents of twins who live together may share household effects, but household effects are not likely to contribute largely to the similarity of siblings and of parents with their offspring because the offspring in our study are adults, thus most live on their own. All family members share 0% of  $V_E$  by definition. Assuming that the variation of a trait is caused by A, D, C (sibling-shared) and E ( $V_P = V_A + V_D + V_C + V_E$ ), the phenotypic covariance of family members can be expressed as a function of  $V_A$ ,  $V_D$ ,  $V_C$  and  $V_E$  (i.e. covariance MZ twins =  $V_A + V_D + V_C$ , covariance DZ twins and sibs =  $1/2 V_A + 1/4 V_D + V_C$ , and covariance parent-offspring =  $1/2 V_A$ ). Correlations, which represent a standardized measure of the shared variance between variables, are also frequently used to summarize the similarity of family members. Following from the equations for the covariances explained above, the phenotypic correlations among relatives can be written as:

$$\text{Phenotypic correlation MZ twins} = h^2 + d^2 + c^2$$

$$\text{Phenotypic correlation Parent-offspring} = \frac{1}{2} h^2$$

$$\text{Phenotypic correlation DZ twin / siblings} = \frac{1}{2} h^2 + \frac{1}{4} d^2 + c^2$$

Where  $h^2$  = proportion of variance due to additive genetic effects ( $V_A / V_P$ ),  $d^2$  = proportion of variance due to non-additive genetic effects ( $V_D / V_P$ ),  $c^2$  = proportion of variance due to sibling shared environment ( $V_C / V_P$ ).

Prior exploratory analyses of the twin family data in Mx indicated the absence of sibling-shared environmental effects for the vast majority of traits in our study; these effects were therefore not included in further analyses. Sex or age differences in  $V_A$ ,  $V_D$ ,  $V_C$  or  $V_E$  are indicated by differences in the pattern of phenotypic correlations in male versus female relatives (“quantitative sex difference”) or young versus old relatives (“quantitative age difference”). A smaller correlation in opposite-sex relatives compared to same-sex relatives indicates that different factors (e.g. different genes or different environmental factors) contribute to variation in males and females (“qualitative sex difference”). Similarly, if the phenotypic correlation decreases with increasing age difference between relatives, this is an indication that different factors may play a role at different ages (“qualitative age difference”).

## Supplemental Figures

**Supplemental Figure 1: Sib-pair resemblance for metabolic syndrome traits.** The figure shows scatterplots of trait values for all sib-sib relations in the sample (including DZ twins).

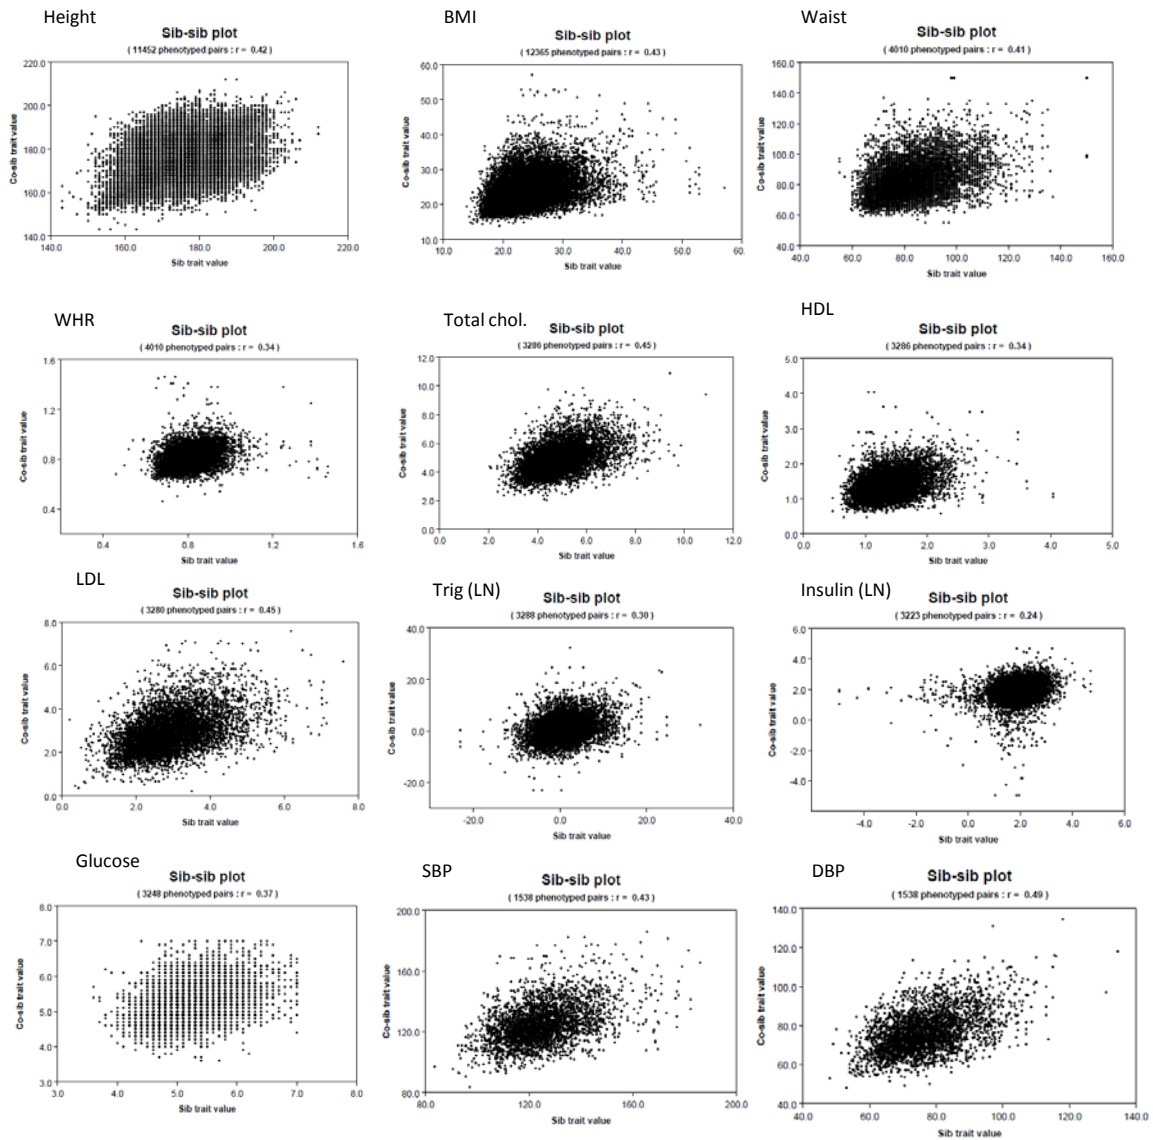

## Supplemental Tables

**Supplemental Table 1: Numbers and age of twins and family members**

|                            | <i>Descriptives total sample</i>         |               |                | <i>Descriptives of twins by zygosity</i> |                     |                  |               |
|----------------------------|------------------------------------------|---------------|----------------|------------------------------------------|---------------------|------------------|---------------|
|                            | N                                        | Age Men (SD)  | Age women (SD) |                                          | N twins<br>in pairs | Total N<br>twins | Age (SD)      |
| <b>BMI</b>                 |                                          |               |                |                                          |                     |                  |               |
| Twins                      | 12877 ( <i>M: 4666, F:8211</i> )         | 28.79 (11.93) | 30.71 (12.84)  | MZM                                      | 1660                | 1901             | 29.83 (12.51) |
| Sisters                    | 2065 ( <i>first: 1759, second: 306</i> ) |               | 35.32 (12.87)  | DZM                                      | 1088                | 1326             | 28.04 (11.87) |
| Brothers                   | 1550 ( <i>first: 1333, second: 217</i> ) | 33.86 (12.88) |                | MZF                                      | 3656                | 4060             | 32.60 (13.68) |
| Parents                    | 10529 ( <i>Mo: 6036; Fa:4493</i> )       | 54.81 (8.37)  | 52.24 (8.86)   | DZF                                      | 2020                | 2345             | 29.90 (12.09) |
| Total                      | 27021 ( <i>M: 10709, F: 16312</i> )      | 40.44 (16.35) | 39.26 (15.30)  | DOS                                      | 2462                | 3245             | 27.77 (11.02) |
| <b>Waist, WHR</b>          |                                          |               |                |                                          |                     |                  |               |
| Twins                      | 4305 ( <i>M: 1496, F: 2809</i> )         | 33.95 (11.62) | 35.45 (11.58)  | MZM                                      | 568                 | 684              | 35.17 (12.66) |
| Sisters                    | 869 ( <i>first: 725, second: 144</i> )   |               | 41.35 (12.88)  | DZM                                      | 286                 | 395              | 32.99 (11.20) |
| Brothers                   | 575 ( <i>first: 500, second: 75</i> )    | 40.03 (13.72) |                | MZF                                      | 1278                | 1514             | 36.52 (11.92) |
| Parents                    | 3216 ( <i>Mo: 2052, Fa: 1164</i> )       | 61.57 (7.34)  | 55.87 (10.60)  | DZF                                      | 670                 | 818              | 34.89 (11.51) |
| Total                      | 8965 ( <i>M: 3235, F: 5730</i> )         | 44.97 (16.58) | 43.66 (14.78)  | DOS                                      | 630                 | 894              | 32.94 (10.00) |
| <b>Glucose and insulin</b> |                                          |               |                |                                          |                     |                  |               |
| Twins                      | 3724( <i>M: 1262, F: 2462</i> )          | 33.95 (10.99) | 35.84 (11.44)  | MZM                                      | 398                 | 579              | 35.07 (11.93) |
| Sisters                    | 1143 ( <i>first: 818, second: 325</i> )  |               | 42.12(10.58)   | DZM                                      | 206                 | 325              | 33.29(11.05)  |
| Brothers                   | 470 ( <i>first: 416 second: 54</i> )     | 39.69 (13.12) |                | MZF                                      | 1018                | 1366             | 36.96 (11.80) |
| Parents                    | 2226 ( <i>Mo: 1263, Fa: 963</i> )        | 61.88 (7.05)  | 60.15(7.57)    | DZF                                      | 526                 | 695              | 35.12 (11.34) |
| Total                      | 7563 ( <i>M: 2697, F: 4866</i> )         | 44.94 (16.38) | 43.61 (14.47)  | DOS                                      | 498                 | 759              | 33.01 (9.40)  |
| <b>Lipids</b>              |                                          |               |                |                                          |                     |                  |               |
| Twins                      | 3721 ( <i>M: 1273, F: 2448</i> )         | 33.92 (11.02) | 35.56 (11.16)  | MZM                                      | 394                 | 583              | 34.87 (11.89) |
| Sisters                    | 1185 ( <i>first: 842, second: 343</i> )  |               | 41.93 (10.47)  | DZM                                      | 212                 | 329              | 33.49 (11.32) |

|          |                                       |               |               |     |      |      |               |
|----------|---------------------------------------|---------------|---------------|-----|------|------|---------------|
| Brothers | 480 ( <i>first: 424, second: 56</i> ) | 39.46(12.66)  |               | MZF | 1004 | 1352 | 36.61 (11.57) |
| Parents  | 2083 ( <i>Mo: 1210, Fa: 873</i> )     | 61.62 (6.98)  | 60.26 (7.70)  | DZF | 526  | 694  | 32.91 (11.00) |
| Total    | 7469 ( <i>M:2628 , F: 4841</i> )      | 44.15 (16.14) | 43.28 (14.39) | DOS | 502  | 763  | 32.95 (9.23)  |

---

**Blood pressure**

|          |                                       |               |               |     |     |     |               |
|----------|---------------------------------------|---------------|---------------|-----|-----|-----|---------------|
| Twins    | 2002 ( <i>M: 765 , F: 1237</i> )      | 32.65 (10.46) | 32.83 (10.72) | MZM | 388 | 416 | 32.53 (9.83)  |
| Sisters  | 243 ( <i>first: 213, second: 30</i> ) |               | 35.23 (11.81) | DZM | 196 | 213 | 32.38 (11.42) |
| Brothers | 185 ( <i>first: 166, second: 19</i> ) | 33.85 (12.02) |               | MZF | 704 | 760 | 33.24 (10.72) |
| Parents  | 362 ( <i>Mo: 185, Fa: 177</i> )       | 47.68 (6.33)  | 45.28 (5.70)  | DZF | 284 | 324 | 31.88 (10.66) |
| Total    | 2792 ( <i>M: 1127 , F: 1665</i> )     | 35.21 (11.54) | 34.57 (11.15) | DOS | 238 | 289 | 33.10 (10.78) |

---

M= Male, F=Female, Mo=Mother, Fa=Father, N=Number of subjects

**Supplemental Table 2:** Twin correlations for metabolic syndrome traits stratified by age and sex.

|                        | Height | BMI  | Waist | WHR  | TC   | HDL  | LDL  | Trig | Insulin | Glucose | SBP  | DBP  |
|------------------------|--------|------|-------|------|------|------|------|------|---------|---------|------|------|
| <b>Young</b>           |        |      |       |      |      |      |      |      |         |         |      |      |
| <i><b>MZ twins</b></i> |        |      |       |      |      |      |      |      |         |         |      |      |
| MZ males               | 0.91   | 0.73 | 0.65  | 0.48 | 0.78 | 0.79 | 0.74 | 0.72 | 0.40    | 0.54    | 0.59 | 0.63 |
| MZ females             | 0.90   | 0.72 | 0.66  | 0.41 | 0.70 | 0.70 | 0.74 | 0.57 | 0.39    | 0.53    | 0.57 | 0.54 |
| <i><b>DZ twins</b></i> |        |      |       |      |      |      |      |      |         |         |      |      |
| DZ males               | 0.55   | 0.58 | 0.47  | 0.50 | 0.43 | 0.36 | 0.43 | 0.32 | 0.26    | 0.42    | 0.48 | 0.25 |
| DZ females             | 0.54   | 0.33 | 0.20  | 0.26 | 0.41 | 0.38 | 0.43 | 0.12 | 0.09    | 0.35    | 0.56 | 0.49 |
| DZ opposite sex        | 0.39   | 0.39 | 0.40  | 0.24 | 0.07 | 0.14 | 0.07 | 0.26 | 0.34    | 0.39    | 0.41 | 0.40 |
| <b>Older twins</b>     |        |      |       |      |      |      |      |      |         |         |      |      |
| <i><b>MZ twins</b></i> |        |      |       |      |      |      |      |      |         |         |      |      |
| MZ males               | 0.89   | 0.75 | 0.76  | 0.57 | 0.67 | 0.58 | 0.64 | 0.69 | 0.56    | 0.43    | 0.67 | 0.69 |
| MZ females             | 0.88   | 0.70 | 0.68  | 0.51 | 0.71 | 0.58 | 0.71 | 0.57 | 0.44    | 0.50    | 0.64 | 0.68 |
| <i><b>DZ twins</b></i> |        |      |       |      |      |      |      |      |         |         |      |      |
| DZ males               | 0.42   | 0.38 | 0.40  | 0.36 | 0.17 | 0.44 | 0.11 | 0.25 | 0.15    | 0.20    | 0.10 | 0.17 |
| DZ females             | 0.55   | 0.32 | 0.42  | 0.38 | 0.47 | 0.34 | 0.40 | 0.30 | 0.22    | 0.35    | 0.50 | 0.48 |
| DZ opposite sex        | 0.57   | 0.19 | 0.27  | 0.34 | 0.47 | 0.34 | 0.41 | 0.21 | 0.25    | 0.25    | 0.22 | 0.26 |

Age categories were defined based on the median age of twins (young twins=twins with an age below the median and older twins=twins with an age above the median). The median age of twins was 32 years for all metabolic syndrome variables. For height only, birth year (median=1973) instead of age was used to define categories. TC= Total cholesterol. Trig= Triglycerides.

**Supplemental Table 3:** Age-specific heritability estimates of metabolic syndrome traits and height.

|                 | Height | BMI   | Waist  | WHR    | TC   | HDL  | LDL  | Trig  | Insulin | Glucose | SBP    | DBP    |
|-----------------|--------|-------|--------|--------|------|------|------|-------|---------|---------|--------|--------|
| <b>Young</b>    |        |       |        |        |      |      |      |       |         |         |        |        |
| $V_p$           | 42.47  | 11.92 | 104.68 | 0.0045 | 0.81 | 0.12 | 0.65 | 20.53 | 0.51    | 0.25    | 132.68 | 92.72  |
| $a^2$           | 0.84   | 0.33  | 0.37   | 0.29   | 0.39 | 0.36 | 0.42 | 0.25  | 0.23    | 0.58    | 0.61   | 0.62   |
| $d^2$           | 0.07   | 0.47  | 0.38   | 0.16   | 0.28 | 0.27 | 0.27 | 0.32  | 0.25    | 0.00    | 0.00   | 0.00   |
| $H^2$           | 0.91   | 0.79  | 0.75   | 0.45   | 0.67 | 0.63 | 0.69 | 0.57  | 0.48    | 0.58    | 0.61   | 0.62   |
| SE              | 0.03   | 0.04  | 0.06   | 0.10   | 0.06 | 0.08 | 0.06 | 0.06  | 0.06    | 0.06    | 0.13   | 0.12   |
| <b>Old</b>      |        |       |        |        |      |      |      |       |         |         |        |        |
| $V_p$           | 43.43  | 16.15 | 135.02 | 0.01   | 1.07 | 0.15 | 0.90 | 22.06 | 0.50    | 0.33    | 211.23 | 120.78 |
| $a^2$           | 0.83   | 0.34  | 0.41   | 0.43   | 0.40 | 0.53 | 0.41 | 0.34  | 0.23    | 0.48    | 0.61   | 0.64   |
| $d^2$           | 0.07   | 0.34  | 0.30   | 0.13   | 0.21 | 0.21 | 0.19 | 0.30  | 0.26    | 0.00    | 0.00   | 0.00   |
| $H^2$           | 0.90   | 0.68  | 0.70   | 0.56   | 0.61 | 0.74 | 0.60 | 0.63  | 0.49    | 0.48    | 0.61   | 0.64   |
| SE              | 0.03   | 0.03  | 0.05   | 0.10   | 0.06 | 0.07 | 0.05 | 0.06  | 0.07    | 0.05    | 0.08   | 0.10   |
| $r_A$ Young-Old | 0.96   | 1.00  | 1.00   | 0.85   | 1.00 | 0.90 | 1.00 | 1.00  | 1.00    | 0.64    | 0.24   | 0.56   |

The estimates were obtained from a model in which  $V_p$ ,  $V_A$  and  $V_E$  were allowed to differ between young and old subjects, whereas  $V_D$  was constant. Age categories were defined based on the median age of subjects (young=subjects with an age below the median and old=subjects with an age above the median). The median age was 35 years for SBP and DBP, 39 years for BMI, 40 years for HDL, LDL, total cholesterol and triglycerides, and 41 for insulin, glucose, waist and WHR. For height only, birth year (median=1966) instead of age was used to define categories. TC= Total cholesterol. Trig= Triglycerides. SE=Robust standard error of the broad heritability estimate from poly.  $r_A$  Young-Old=Correlation between additive genetic effects in young and old subjects.
